# Supplementary material for: Free-ranging dogs show age related plasticity in their ability to follow human pointing
Source: PubMed Central journal article supplement (PMC5513426; doi:10.1371/journal.pone.0180643), 2017-07-17
Supplement: pone.0180643.s001.pdf [file pone.0180643.s001.pdf]

1 **Free-ranging dogs show age related plasticity in their ability to follow human pointing**

2 Debottam Bhattacharjee<sup>1</sup>, Nikhil Dev N<sup>1,2</sup>, Shreya Gupta<sup>1,3</sup>, Shubhra Sau<sup>1</sup>, Rohan Sarkar<sup>1</sup>,  
3 Arpita Biswas<sup>1</sup>, Arunita Banerjee<sup>1</sup>, Daisy Babu<sup>1</sup>, Diksha Mehta<sup>1,4</sup> and Anindita Bhadra<sup>1\*</sup>

4

5 Affiliations:

6 <sup>1</sup> Department of Biological Sciences, Indian Institute of Science Education and Research  
7 Kolkata, Nadia, West Bengal, India

8 <sup>2</sup> Indian Institute of Science Education and Research Thiruvannathapuram, Kerala, India

9 <sup>3</sup> Indian Institute of Science Education and Research Bhopal, Madhya Pradesh, India

10 <sup>4</sup> Shivaji College, University of Delhi, Delhi, India

11

12 \*Corresponding author

13 E-mail: [abhadra@iiserkol.ac.in](mailto:abhadra@iiserkol.ac.in) (AB)

14

15

16

17

18 **S1 Table. Sample sizes used for the three age categories in the experiment for test and**  
19 **control conditions**

|  |  |  |  |
|--|--|--|--|
|  |  |  |  |
|--|--|--|--|

|                          | <b>No. of pups</b> | <b>No. of juveniles</b> | <b>No. of adults</b> |
|--------------------------|--------------------|-------------------------|----------------------|
| <b>Test condition</b>    | 36                 | 30                      | 42                   |
| <b>Control condition</b> | 32                 | 28                      | 41                   |
