# Supplementary material for: Free-ranging dogs show age related plasticity in their ability to follow human pointing
Source: PubMed Central journal article supplement (PMC5513426; doi:10.1371/journal.pone.0180643), 2017-07-17
Supplement: pone.0180643.s004.pdf [file pone.0180643.s004.pdf]

1 **Free-ranging dogs show age related plasticity in their ability to follow human pointing**

2 Debottam Bhattacharjee<sup>1</sup>, Nikhil Dev N<sup>1,2</sup>, Shreya Gupta<sup>1,3</sup>, Shubhra Sau<sup>1</sup>, Rohan Sarkar<sup>1</sup>,

3 Arpita Biswas<sup>1</sup>, Arunita Banerjee<sup>1</sup>, Daisy Babu<sup>1</sup>, Diksha Mehta<sup>1,4</sup> and Anindita Bhadra<sup>1\*</sup>

4

5 Affiliations:

6 <sup>1</sup> Department of Biological Sciences, Indian Institute of Science Education and Research

7 Kolkata, Nadia, West Bengal, India

8 <sup>2</sup> Indian Institute of Science Education and Research Thiruvannathapuram, Kerala, India

9 <sup>3</sup> Indian Institute of Science Education and Research Bhopal, Madhya Pradesh, India

10 <sup>4</sup> Shivaji College, University of Delhi, Delhi, India

11

12 \*Corresponding author

13 E-mail: [abhadra@iiserkol.ac.in](mailto:abhadra@iiserkol.ac.in) (AB)

14

15

16

17

18

19

20

21

22

23

24

25

26

27

28

29

30

31

32

33

34

35

36

Cox Proportional Hazards test:

```

37
38 coxph(formula = Surv(dat$time, dat$status) ~ groupmod)
39
40     n= 108, number of events= 72
41
42             coef exp(coef) se(coef)      z Pr(>|z|)
43 groupmodjuvenile -0.5602    0.5711  0.3359 -1.668 0.09535 .
44 groupmodpup      0.7356    2.0868  0.2632  2.795 0.00519 **
45 ---
46 Signif. codes:  0 '***' 0.001 '**' 0.01 '*' 0.05 '.' 0.1 ' ' 1
47
48             exp(coef) exp(-coef) lower .95 upper .95
49 groupmodjuvenile    0.5711    1.7510    0.2957    1.103
50 groupmodpup         2.0868    0.4792    1.2459    3.495
51
52 Concordance= 0.647 (se = 0.039 )
53 Rsquare= 0.148 (max possible= 0.996 )
54 Likelihood ratio test= 17.26 on 2 df,  p=0.000179
55 Wald test               = 17.04 on 2 df,  p=0.0001992
56 Score (logrank) test = 18.61 on 2 df,  p=9.092e-05
57
58
59
60 Proportional Hazard's assumption:
61
62 > cxp.assum <- cox.zph(cxp)
63 > cxp.assum
64             rho chisq      p
65 groupmodjuvenile -0.109 0.864 0.353
66 groupmodpup      -0.144 1.427 0.232
67 GLOBAL           NA 1.670 0.434
68
69
70 Log Rank test:
71
72 > log_rank <- survdiff(Surv(dat$time, dat$status) ~ groupmod, rho = 0)
73 > log_rank
74 Call:
75 survdiff(formula = Surv(dat$time, dat$status) ~ groupmod, rho = 0)
76
77             N Observed Expected (O-E)^2/E (O-E)^2/V
78 groupmod=adult  42      28     30.3    0.175    0.346
79 groupmod=juvenile 30      13     24.1    5.128    8.876
80 groupmod=pup     36      31     17.6   10.255   15.943
81

```
