# Supplementary material for: Free-ranging dogs show age related plasticity in their ability to follow human pointing
Source: PubMed Central journal article supplement (PMC5513426; doi:10.1371/journal.pone.0180643), 2017-07-17
Supplement: pone.0180643.s009.pdf [file pone.0180643.s009.pdf]

1 **Free-ranging dogs show age related plasticity in their ability to follow human pointing**

2 Debottam Bhattacharjee<sup>1</sup>, Nikhil Dev N<sup>1,2</sup>, Shreya Gupta<sup>1,3</sup>, Shubhra Sau<sup>1</sup>, Rohan Sarkar<sup>1</sup>,  
3 Arpita Biswas<sup>1</sup>, Arunita Banerjee<sup>1</sup>, Daisy Babu<sup>1</sup>, Diksha Mehta<sup>1,4</sup> and Anindita Bhadra<sup>1\*</sup>

4

5 Affiliations:

6 <sup>1</sup> Department of Biological Sciences, Indian Institute of Science Education and Research  
7 Kolkata, Nadia, West Bengal, India

8 <sup>2</sup> Indian Institute of Science Education and Research Thiruvannathapuram, Kerala, India

9 <sup>3</sup> Indian Institute of Science Education and Research Bhopal, Madhya Pradesh, India

10 <sup>4</sup> Shivaji College, University of Delhi, Delhi, India

11

12 \*Corresponding author

13 E-mail: [abhadra@iiserkol.ac.in](mailto:abhadra@iiserkol.ac.in) (AB)

14

15

16

17

18

19

20 **Fig S3. Experimenter 2 standing in a neutral posture in control condition**

21

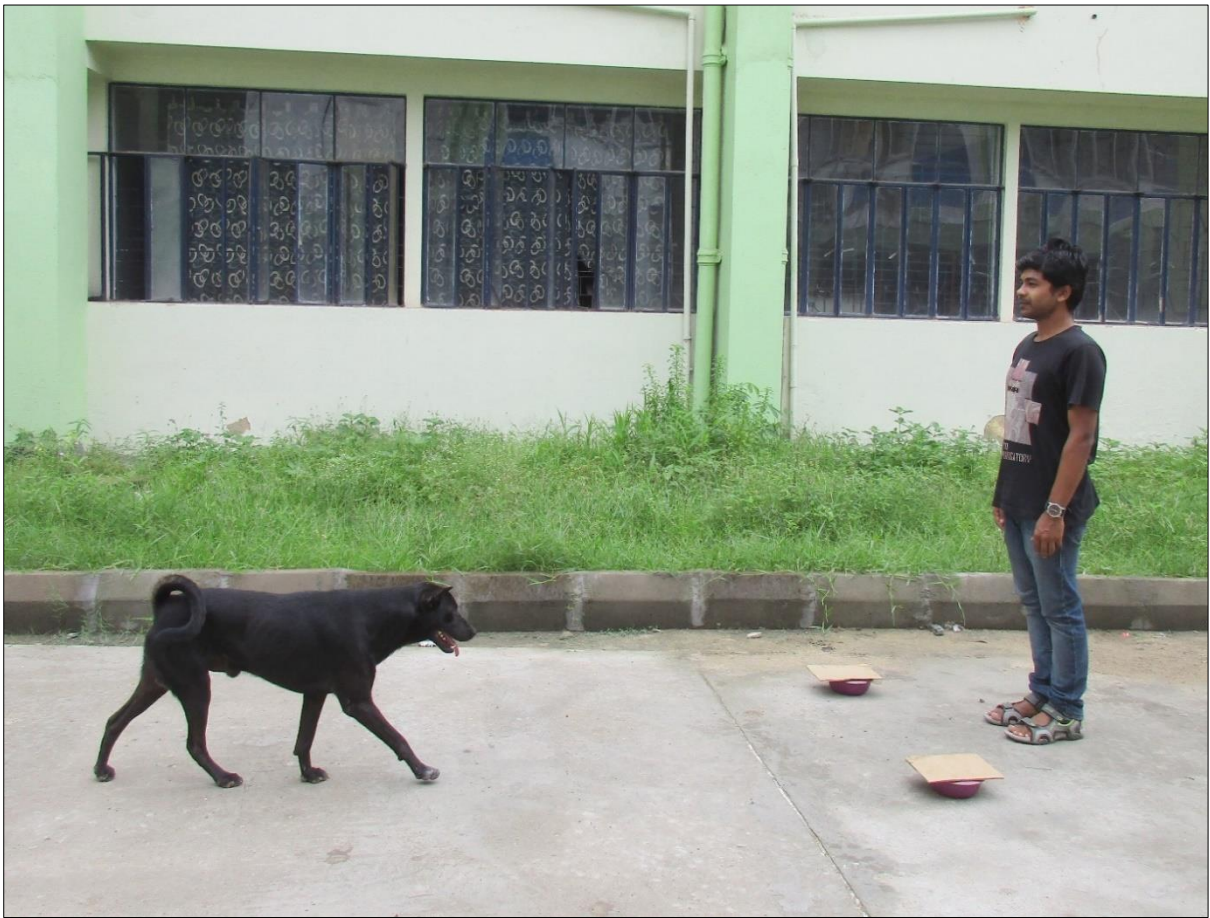

22

23
