# Supplementary material for: Free-ranging dogs show age related plasticity in their ability to follow human pointing
Source: PLoS One. 2017 Jul 17;12(7):e0180643. doi: 10.1371/journal.pone.0180643 (PMC5513426; doi:10.1371/journal.pone.0180643)
Supplement: S2 Table — (PDF) [file pone.0180643.s002.pdf]

**Free-ranging dogs show age related plasticity in their ability to follow human pointing**

Debottam Bhattacharjee<sup>1</sup>, Nikhil Dev N<sup>1,2</sup>, Shreya Gupta<sup>1,3</sup>, Shubhra Sau<sup>1</sup>, Rohan Sarkar<sup>1</sup>,  
Arpita Biswas<sup>1</sup>, Arunita Banerjee<sup>1</sup>, Daisy Babu<sup>1</sup>, Diksha Mehta<sup>1,4</sup> and Anindita Bhadra<sup>1\*</sup>

Affiliations:

<sup>1</sup> Department of Biological Sciences, Indian Institute of Science Education and Research  
Kolkata, Nadia, West Bengal, India

<sup>2</sup> Indian Institute of Science Education and Research Thiruvannanthapuram, Kerala, India

<sup>3</sup> Indian Institute of Science Education and Research Bhopal, Madhya Pradesh, India

<sup>4</sup> Shivaji College, University of Delhi, Delhi, India

\*Corresponding author

E-mail: [abhadra@iiserkol.ac.in](mailto:abhadra@iiserkol.ac.in) (AB)

**S2 Table. Age wise sample size of pups used for test and control experiments**

| 4 <sup>th</sup> Week | 5 <sup>th</sup> Week | 6 <sup>th</sup> Week | 7 <sup>th</sup> Week | 8 <sup>th</sup> Week |
|----------------------|----------------------|----------------------|----------------------|----------------------|
| 13                   | 17                   | 12                   | 15                   | 11                   |
